# Supplementary material
Source: PubMed Central journal article supplement (PMC2771112)
Supplement: NIHMS39794-supplement-01.pdf [file NIHMS39794-supplement-01.pdf]

**SUPPLEMENTARY MATERIAL****Crystal Structures of Manganese- and Cobalt-substituted Myoglobin in Complex with NO and Nitrite Reveal Unusual Ligand Conformations**

Zaki N. Zahran, Lilian Chooback, Daniel M. Copeland, Ann H. West,  
and George B. Richter-Addo\*

*From the Department of Chemistry and Biochemistry, University of Oklahoma, 620  
Parrington Oval, Norman, OK 73019.*

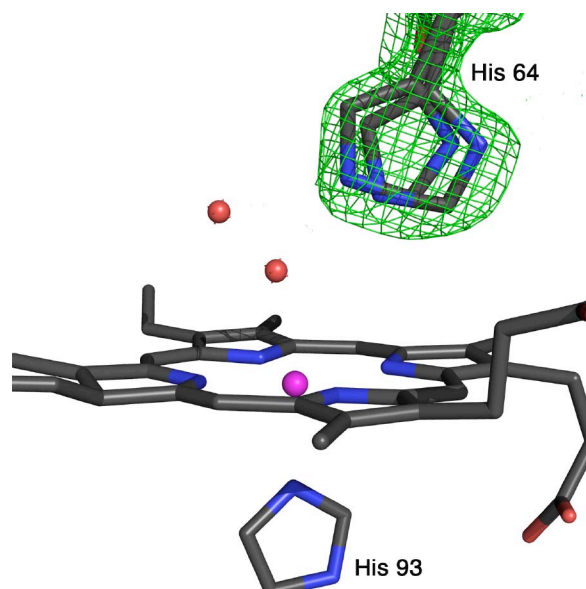

**Fig. S1.** Final model of the Mn-heme environment in Mn<sup>III</sup>Mb(H<sub>2</sub>O), and the 2F<sub>o</sub>-F<sub>c</sub> electron density map, contoured at 1σ, associated with the two conformations of the distal His64 residue.

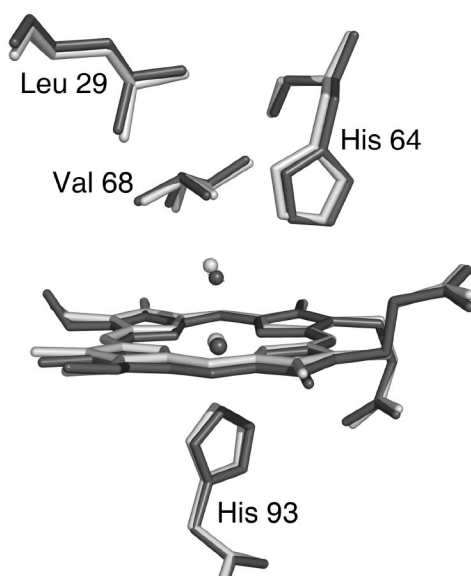

**Fig. S2.** A superposition of the heme environments in the crystal structures of hh  $\text{Co}^{\text{III}}\text{Mb}(\text{H}_2\text{O})$  (this work, shown in light grey) and sw  $\text{Co}^{\text{III}}\text{Mb}(\text{H}_2\text{O})$  (pdb code 1YOH [69], shown in dark grey) using a global  $\text{C}\alpha$  structural alignment.

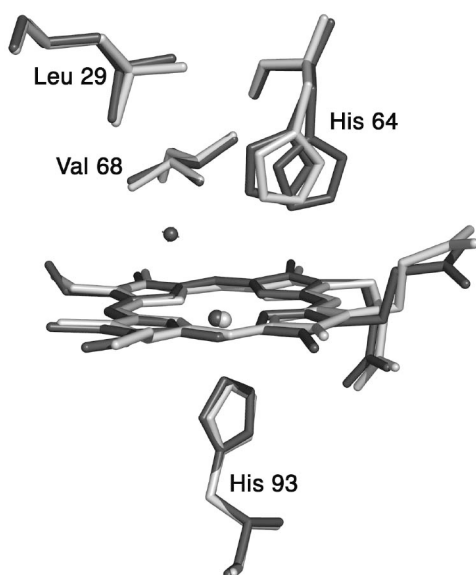

**Fig. S3.** A superposition of the heme environments in the crystal structures of hh  $\text{Mn}^{\text{II}}\text{Mb}$  (this work, shown in light grey) and hh  $\text{Fe}^{\text{II}}\text{Mb}$  (pdb code 1A6N [90], shown in dark grey) using a global  $\text{C}\alpha$  structural alignment. The distal pocket water in hh  $\text{Fe}^{\text{II}}\text{Mb}$  is located 3.53 Å from Fe, and is 2.76 Å from the inward conformation of the distal His64 residue; the outer conformation overlaps with that of *aquomet*Mb.
